# Supplementary material for: Planktivorous fishes withstand 20 years of major coral cover oscillations
Source: Research Square preprint supplement (doi:10.21203/rs.3.rs-8740892/v1), 2026-02-12
Supplement: Supplementary file 1 [file d45b02ff8004c75d137f37b7.docx]

**Supplementary information: Planktivorous fishes withstand 20 years of major coral cover oscillations**

Mathieu Reynaud, Tom Garine-Wichatitsky, Renato Morais, Valeriano Parravicini, Fabien Moratand Benoit Pujol

**Supplementary tables**

**Table S1: List of species described as strict planktivorous fishes**

| **Family** | **Genus** | **Species** | **Taxon** |
| --- | --- | --- | --- |
| *Acanthuridae* | *Acanthurus* | *mata* | *Acanthurus mata* |
| *Anthiadidae* | *Pseudanthias* | *mooreanus* | *Pseudanthias mooreanus* |
| *Anthiadidae* | *Pseudanthias* | *olivaceus* | *Pseudanthias olivaceus* |
| *Anthiadidae* | *Pseudanthias* | *pascalus* | *Pseudanthias pascalus* |
| *Atherinidae* | *Atherinomorus* | *sp* | *Atherinomorus sp* |
| *Caesionidae* | *Pterocaesio* | *tile* | *Pterocaesio tile* |
| *Carangidae* | *Decapterus* | *macarellus* | *Decapterus macarellus* |
| *Chaetodontidae* | *Hemitaurichthys* | *polylepis* | *Hemitaurichthys polylepis* |
| *Chaetodontidae* | *Heniochus* | *acuminatus* | *Heniochus acuminatus* |
| *Clupeidae* | *Clupeidae* | *sp* | *Clupeidae sp* |
| *Hemiramphidae* | *Hyporhamphus* | *affinis* | *Hyporhamphus affinis* |
| *Holocentridae* | *Myripristis* | *adusta* | *Myripristis adusta* |
| *Holocentridae* | *Myripristis* | *berndti* | *Myripristis berndti* |
| *Holocentridae* | *Myripristis* | *kuntee* | *Myripristis kuntee* |
| *Holocentridae* | *Myripristis* | *murdjan* | *Myripristis murdjan* |
| *Holocentridae* | *Myripristis* | *violacea* | *Myripristis violacea* |
| *Labridae* | *Cirrhilabrus* | *exquisitus* | *Cirrhilabrus exquisitus* |
| *Labridae* | *Cirrhilabrus* | *scottorum* | *Cirrhilabrus scottorum* |
| *Labridae* | *Pseudocoris* | *aurantiofasciata* | *Pseudocoris aurantiofasciata* |
| *Labridae* | *Thalassoma* | *amblycephalum* | *Thalassoma amblycephalum* |
| *Microdesmidae* | *Ptereleotris* | *evides* | *Ptereleotris evides* |
| *Microdesmidae* | *Ptereleotris* | *microlepis* | *Ptereleotris microlepis* |
| *Microdesmidae* | *Ptereleotris* | *zebra* | *Ptereleotris zebra* |
| *Microdesmidae* | *Nemateleotris* | *magnifica* | *Nemateleotris magnifica* |
| *Pomacentridae* | *Amphiprion* | *chrysopterus* | *Amphiprion chrysopterus* |
| *Pomacentridae* | *Dascyllus* | *aruanus* | *Dascyllus aruanus* |
| *Pomacentridae* | *Dascyllus* | *flavicaudus* | *Dascyllus flavicaudus* |
| *Pomacentridae* | *Dascyllus* | *reticulatus* | *Dascyllus reticulatus* |
| *Pomacentridae* | *Dascyllus* | *trimaculatus* | *Dascyllus trimaculatus* |
| *Pomacentridae* | *Lepidozygus* | *tapeinosoma* | *Lepidozygus tapeinosoma* |
| *Pomacentridae* | *Pomachromis* | *fuscidorsalis* | *Pomachromis fuscidorsalis* |
| *Pomacentridae* | *Chromis* | *alpha* | *Chromis alpha* |
| *Pomacentridae* | *Chromis* | *atripectoralis* | *Chromis atripectoralis* |
| *Pomacentridae* | *Chromis* | *sp* | *Chromis sp* |
| *Pomacentridae* | *Chromis* | *viridis* | *Chromis viridis* |
| *Pomacentridae* | *Chromis* | *xanthura* | *Chromis xanthura* |
| *Pomacentridae* | *Pycnochromis* | *acares* | *Pycnochromis acares* |
| *Pomacentridae* | *Pycnochromis* | *agilis* | *Pycnochromis agilis* |
| *Pomacentridae* | *Pycnochromis* | *iomelas* | *Pycnochromis iomelas* |
| *Pomacentridae* | *Pycnochromis* | *margaritifer* | *Pycnochromis margaritifer* |
| *Pomacentridae* | *Pycnochromis* | *vanderbilti* | *Pycnochromis vanderbilti* |
| *Spratelloididae* | *Spratelloides* | *gracilis* | *Spratelloides gracilis* |

**Table S2: Results of the PERMANOVA analysis on the outer slope planktivorous fish community (999 permutations used)**

| **Term** | **Df** | **SumOfSqs** | **R²** | **F** | **p-value** |
| --- | --- | --- | --- | --- | --- |
| Period | 3 | 21.55 | 0.07757 | 28.228 | 0.001 |
| Residuals | 1007 | 256.25 | 0.92243 |  |  |
| Total | 1010 | 277.8 | 1 |  |  |

**Table S3: Results of the SIMPER analysis on the forereef planktivorous fish community (999 permutations used)**

The SIMPER results to compare responses across pairwise combinations.

| Comparison | Species | Average dissimilarity | SD | Contribution % | Cumulative contribution % | P-value |
| --- | --- | --- | --- | --- | --- | --- |
| Initial_shock1 | *Pycnochromis vanderbilti* | 0.316 | 0.225 | 45.574 | 0.457 | **0.001** |
| Initial_shock1 | *Pycnochromis iomelas* | 0.089 | 0.099 | 13.662 | 0.585 | **0.022** |
| Initial_shock1 | *Pycnochromis acares* | 0.057 | 0.145 | 15.118 | 0.668 | 1.000 |
| Initial_shock1 | *Cirrhilabrus scottorum* | 0.056 | 0.064 | 10.903 | 0.748 | 0.767 |
| Initial_shock1 | *Lepidozygus tapeinosoma* | 0.045 | 0.095 | 8.236 | 0.813 | 0.373 |
| Shock1_Recovery | *Pycnochromis vanderbilti* | 0.240 | 0.191 | 66.560 | 0.336 | 1.000 |
| Shock1_Recovery | *Pycnochromis acares* | 0.153 | 0.174 | 41.956 | 0.550 | **0.001** |
| Shock1_Recovery | *Pycnochromis iomelas* | 0.080 | 0.095 | 13.059 | 0.662 | 0.714 |
| Shock1_Recovery | *Cirrhilabrus scottorum* | 0.058 | 0.065 | 9.938 | 0.743 | 0.475 |
| Shock1_Recovery | *Lepidozygus tapeinosoma* | 0.045 | 0.098 | 7.974 | 0.806 | 0.354 |
| Recovery_Shock2 | *Pycnochromis vanderbilti* | 0.213 | 0.184 | 33.918 | 0.292 | 1.000 |
| Recovery_Shock2 | *Pycnochromis acares* | 0.173 | 0.159 | 41.448 | 0.527 | **0.001** |
| Recovery_Shock2 | *Pycnochromis iomelas* | 0.080 | 0.098 | 16.809 | 0.637 | 0.695 |
| Recovery_Shock2 | *Cirrhilabrus scottorum* | 0.067 | 0.069 | 17.320 | 0.728 | **0.001** |
| Recovery_Shock2 | *Lepidozygus tapeinosoma* | 0.047 | 0.114 | 12.201 | 0.792 | 0.204 |

**Supplementary figures**

**
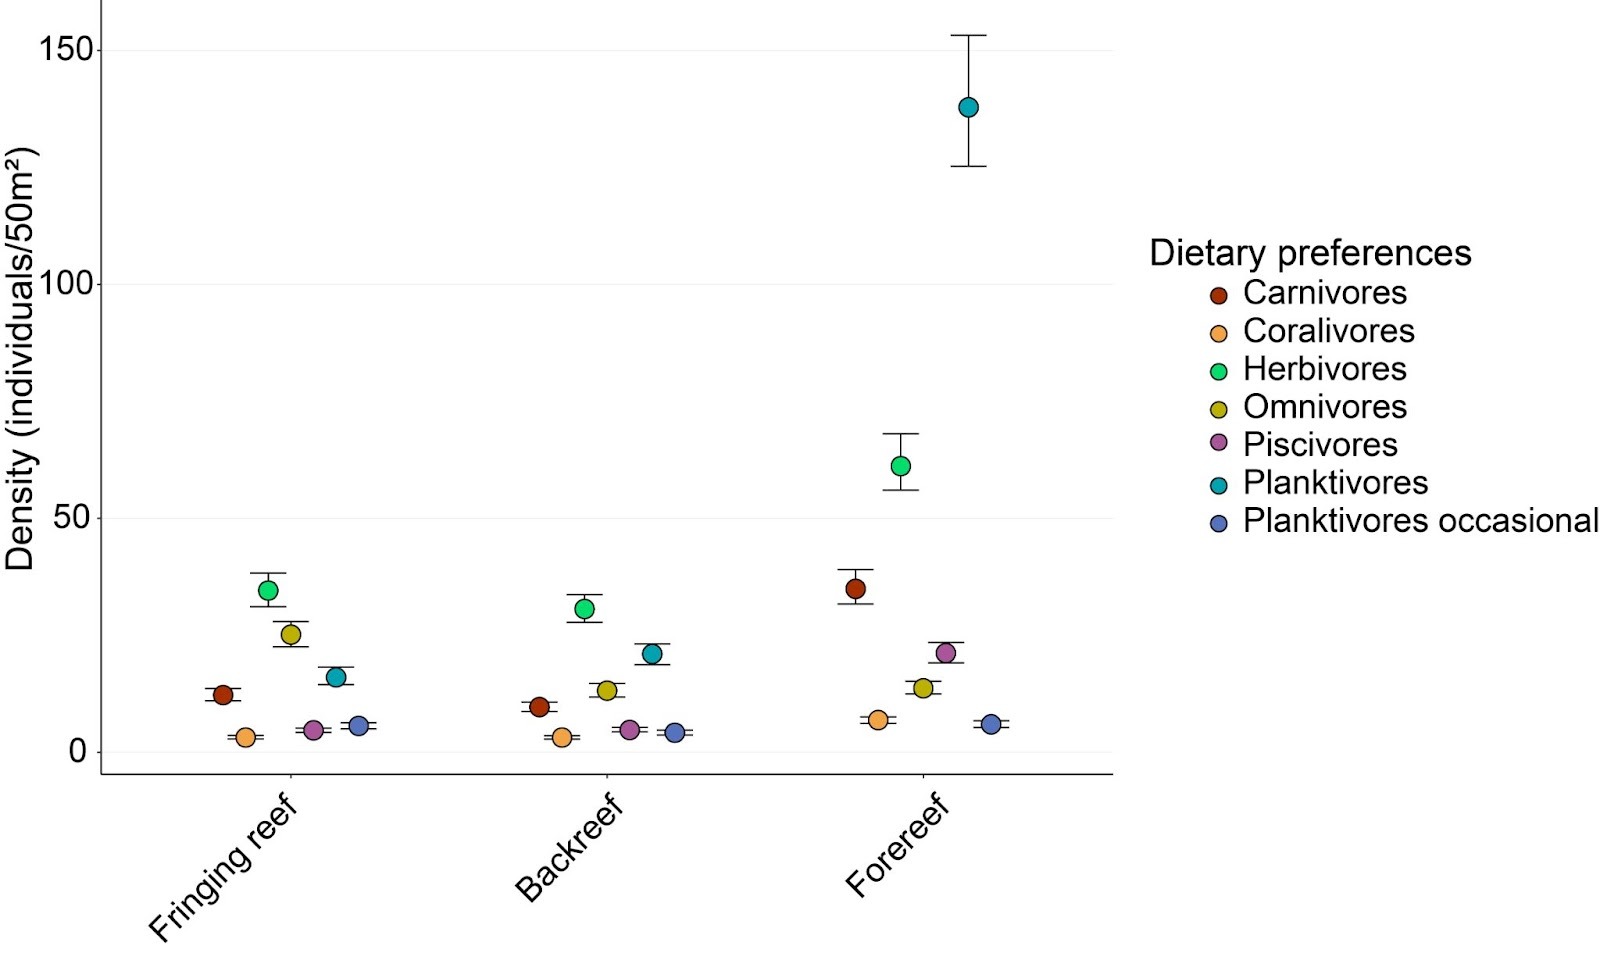
**

**Figure S1: Density for all trophic guilds based on dietary preference**

Density of fish among trophic guilds and reef types (fringing reef, backreef and forereef). Full points show the median abundance per 50 m², and error bar correspond to lower and upper from the predictive posterior distribution.


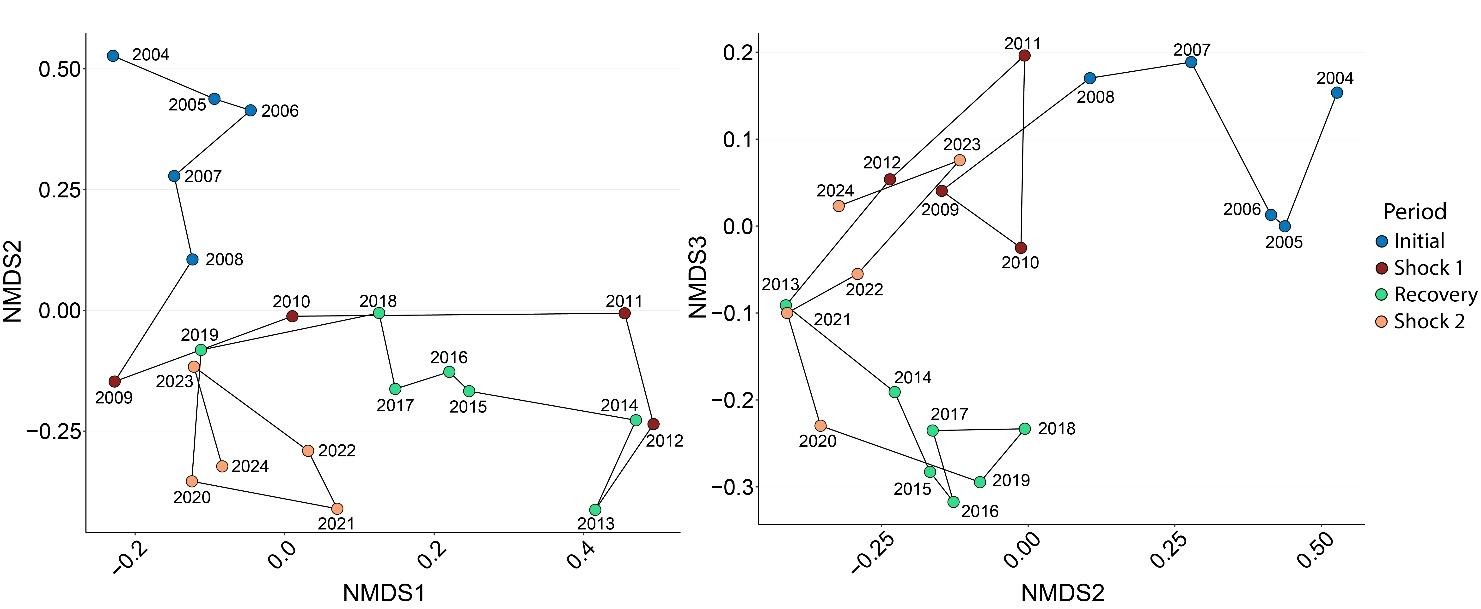


**Figure S2: Forereef planktivorous fish trajectory over time**

Non-metric multidimensional scaling (NMDS) of planktivorous fish assemblages, showing the temporal trajectory of community composition and density. NMDS1 vs NMDS2 & NMDS2 vs NMDS3.


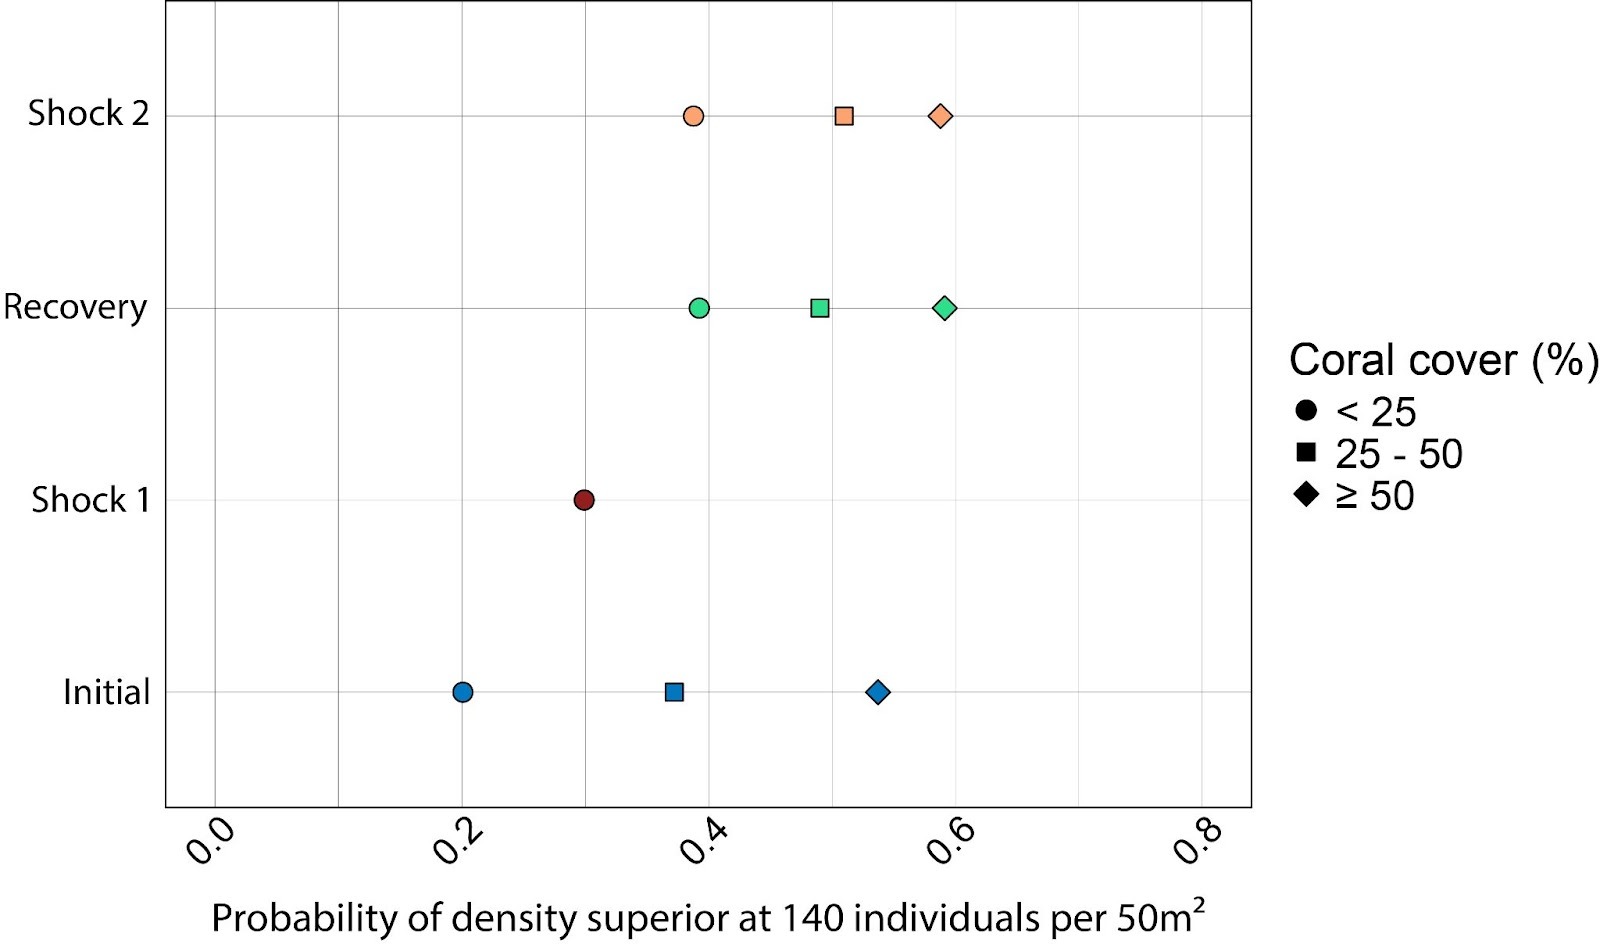


**Figure S3: Probability of planktivorous fish density superior to the average per class of percentage of coral cover**

For each period, the probability of density superior at the average (140 individuals per 50 m²) per class of percentage of coral cover has been calculated to draw from the posterior distribution.


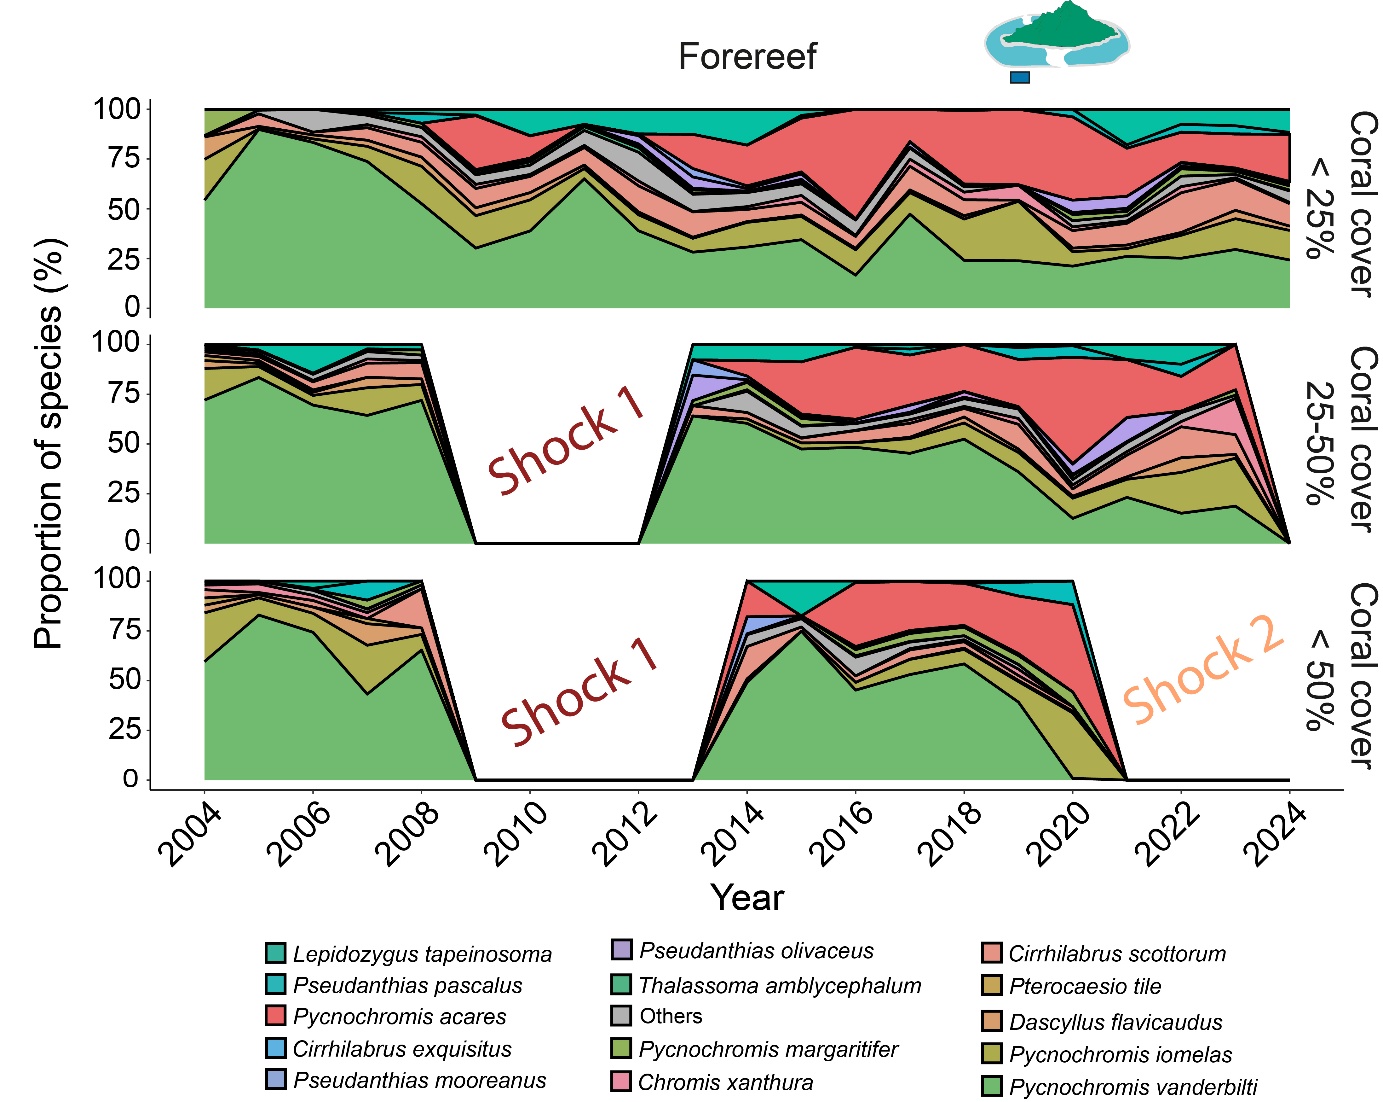


**Figure S4: Species proportion among the cover coral zone on the forereef**

Proportion of the most present planktivorous fish species on the Forereef. Planktivorous fish species with low occurrence (only few observations) have been grouped in the category “others”.
